## Oligopeptide transporter PepT1 in Atlantic cod (*Gadus morhua* L.): cloning, tissue expression and comparative aspects

Ivar Rønnestad<sup>1,\*</sup>, Paulo J. Gavaia<sup>2</sup>, Carla S. B. Viegas<sup>2</sup>, Tiziano Verri<sup>3</sup>, Alessandro Romano<sup>3</sup>, Tom Ole Nilsen<sup>1</sup>, Ann-Elise O. Jordal<sup>1</sup>, Yuko Kamisaka<sup>1</sup> and M. Leonor Cancela<sup>2</sup>

<sup>1</sup>University of Bergen, Department of Biology, N-5020 Bergen, Norway, <sup>2</sup>University of Algarve –CCMAR, Campus de Gambelas, 8005-139 Faro, Portugal and <sup>3</sup>University of Salento (formerly University of Lecce), Department of Biological and Environmental Sciences and Technologies, I-73100 Lecce, Italy

\*Author for correspondence (e-mail: ivar.ronnestad@bio.uib.no)

Accepted 29 August 2007

### Summary

A novel full-length cDNA that encodes for the Atlantic cod (*Gadus morhua* L.) PepT1-type oligopeptide transporter has been cloned. This cDNA (named codPepT1) was 2838 bp long, with an open reading frame of 2190 bp encoding a putative protein of 729 amino acids. Comparison of the predicted Atlantic cod PepT1 protein with zebrafish, bird and mammalian orthologs allowed detection of many structural features that are highly conserved among all the vertebrate proteins analysed, including (1) a larger than expected area of hydrophobic amino acids in close proximity to the N terminus; (2) a single highly conserved cAMP/cGMP-dependent protein kinase phosphorylation motif; (3) a large N-glycosylation-rich region within the large extracellular loop; and (4) a conserved and previously undescribed stretch of 8–12 amino acid residues within the large extracellular loop. Expression analysis at the mRNA level indicated that

Atlantic cod PepT1 is mainly expressed at intestinal level, but that it is also present in kidney and spleen. Analysis of its regional distribution along the intestinal tract of the fish revealed that PepT1 is ubiquitously expressed in all segments beyond the stomach, including the pyloric caeca, and through the whole midgut. Only in the last segment, which included the hindgut, was there a lower expression. Atlantic cod PepT1, the second teleost fish PepT1-type transporter documented to date, will contribute to the elucidation of the evolutionary and functional relationships among vertebrate peptide transporters. Moreover, it can represent a useful tool for the study of gut functional regionalization, as well as a marker for the analysis of temporal and spatial expression during ontogeny.

Key words: oligopeptide transporter PepT1, comparative sequence analysis, tissue expression, peptide, teleost.

### Introduction

Uptake of oligopeptides (di- and tripeptides) into cells is due to membrane transport proteins that belong to the so-called SoLute Carrier 15 (SLC15) family (Daniel and Kottra, 2004). One of the members of this family, namely PepT1 (or SLC15A1), is highly expressed in the intestine of vertebrates, where it is responsible for the transport of a significant fraction of dietary protein across the brush-border membrane of the small intestinal epithelium (for a review, see Daniel, 2004). PepT1 functions as a Na<sup>+</sup>-independent, H<sup>+</sup>-dependent, H<sup>+</sup>-coupled transporter of a variety of di- and tripeptides. PepT1 is also responsible for the transport of orally active drugs, such as  $\beta$ -lactam antibiotics, aminopeptidase and angiotensin-converting enzyme inhibitors,  $\delta$ -aminolevulinic acid, and many selected pro-drugs (for a review, see Rubio-Aliaga and Daniel, 2002).

PepT1 proteins have been characterized in great detail in higher vertebrates [mostly in mammals, but also in birds (Daniel et al., 2006)]. In contrast, information about these proteins in lower vertebrates is very limited, with the sole exception of the

PepT1-type oligopeptide transporter of the teleost zebrafish *Danio rerio*, whose functional activity and pattern of expression in tissue has been assessed (Verri et al., 2003). In particular, zebrafish PepT1 is highly expressed in the proximal intestine, where it mediates the uptake of a large amount of di- and tripeptides derived from the protein digestion process.

We report here the cloning of a full-length cDNA that encodes for the PepT1-type oligopeptide transporter of the Atlantic cod (*Gadus morhua* L.). This is an important commercial species in many North Atlantic countries, and has recently been targeted for aquaculture, mainly due to depletion of natural stocks by overfishing (e.g. Brander, 2007). For this reason, Atlantic cod has become an important model fish species. The complete Atlantic cod PepT1 sequence, the second fish sequence resolved to date, has made a detailed comparison along the vertebrate series possible, allowing identification of highly conserved motifs/regions in all the vertebrate PepT1 transporters. It also became possible to study tissue expression as well as the regional distribution in the digestive tract of the transporter at the mRNA level.

## Materials and methods

### *Animals and tissue sampling*

Atlantic cods (*Gadus morhua* L.) used in this experimental work (45 cm in length) were reared in commercial systems, or at the Bergen High-Technology Centre (Bergen, Norway). Fish were routinely fed to satiety once daily, and fasted for 36–48 h prior to sampling. The fish were killed by a blow to the head and their organs were rapidly removed, transferred into RNAlater (Ambion, Austin, TX, USA) and stored at –80°C until RNA extraction. In two fish, the gut was dissected into ten sections for regional analysis of the spatial distribution along the intestinal tract. The segments were stomach, pyloric area, pyloric caeca (inner and outer segments), and six segments in the remainder of the intestine based on divisions of the three loops present in the dissected gut. The last segment (segment 10) also comprised the hindgut.

### *Molecular cloning*

Total RNA was isolated from cod intestine using the acid guanidinium thiocyanate-phenol-chloroform method (Chomczynski and Sacchi, 1987). Total RNA (1 µg) was reverse transcribed at 37°C for 1 h using Moloney Murine Leukemia Virus Reverse Transcriptase (M-MLVRT; Invitrogen, Carlsbad, CA, USA) and a reverse oligo(dT)-adapter [5'-ACGCGTCGAC-CTCGAGATCGATG(T)<sub>18</sub>-3']. Amplification of a partial Atlantic cod PepT1 (codPepT1) was performed by polymerase chain reaction (PCR) using *Taq* DNA polymerase and degenerate primers whose design was based on conserved regions of known vertebrate PepT1 genes. Among these, the sequences from icefish (*Chionodraco hamatus*; GenBank accession no. AY170828), European eel (*Anguilla anguilla*; GenBank accession no. AY167576) and zebrafish (*Danio rerio*; GenBank accession no. AY300011). In addition, by data-mining EST sequences and *via* manual and automated (<http://genes.mit.edu/genomescan.html>) predictions of locations and exon–intron boundaries, respectively, the partial cDNA for *Salmo salar* (TPA Database accession no. BK004882) and for *Takifugu rubripes* (TPA Database accession no. BK004883) were outlined and included in the design of the following degenerate primers: forward primer-1 (FP-1; 5'-GCDGCMTTYGGDGGAGAYCAGTT-3') and reverse primer-1 (RP-1; 5'-CCAGTCCAACCCAGTGCKCYCTYTTKGG-3'). The PCR reactions were conducted for 30 cycles (1 cycle: 30 s at 95°C, 45 s at 58°C and 1 min at 72°C), followed by a 10 min final extension at 72°C, with *Taq* DNA polymerase (Invitrogen). The PCR products were size-fractionated in a 2% agarose gel by electrophoresis and the fragment of the expected size was gel-purified using the GFX PCR DNA and Gel Band Purification Kit (Amersham Biosciences, Uppsala, Sweden), ligated into the pGEM-T Easy vector (Promega, Madison, WI, USA), and multiple clones were screened by sequencing. The identity of the resulting PCR product was confirmed by DNA sequence analysis at Macrogen Inc. (South Korea).

The full-length sequence of codPepT1 was obtained by 3' and 5' RACE using the Marathon cDNA Amplification Kit (Clontech, Mountain View, CA, USA) with Advantage Klen *Taq* polymerase (Clontech). PolyA(+) RNA was purified with the Oligotex mRNA Midi Kit (Qiagen GmbH, Hilden, Germany). 1 µg of this mRNA was used to construct one Marathon cDNA library (Clontech) and the 5' and 3' ends were

obtained by rapid amplification of cDNA ends (RACE)-PCR using Advantage Klen *Taq* polymerase, the AP1 primer and gene-specific primers codPepT1-F1 (5'-CTCCATCTTCTACTGTCCATCAACGCA-3') and codPepT1-R1 (5'-GCTACGGTTCCTGAAGCGGTTTTTGACT-3'). Amplification conditions were those suggested by the supplier. PCR products were size-separated by agarose gel electrophoresis and visualized by ethidium bromide staining, extracted from the gel with GFX PCR DNA and the Gel Band Purification Kit, and cloned into the pGEM-T Easy vector. Final identification was made by DNA sequence analysis at Macrogen Inc.

### *In silico analysis*

The codPepT1 amino acid sequence was deduced using the open reading frame (ORF) finder program at <http://www.ncbi.nlm.nih.gov>. Putative transmembrane domains were predicted using TMHMM 2.0 (<http://www.cbs.dtu.dk/services/TMHMM-2.0/>), which is part of the Simple Modular Architecture Research Tool (SMART; at <http://www.expasy.org/prosite/>). Potential N-glycosylation, cAMP/cGMP-dependent protein kinase and protein kinase C recognition sequences were identified using the PROSITE 19.7 computational tools (<http://www.expasy.org/prosite/>).

Nucleotide sequences were routinely compared with the GenBank database using the BLAST algorithm (Altschul et al., 1997). Clustal W 1.82 was used to align amino acid sequences (www.ebi.ac.uk/clustalw). The phylogenetic reconstruction was generated using the neighbor-joining (NJ) method (Saitou and Nei, 1987), as implemented in MEGA 3.0 (Kumar et al., 2004). Phylogenetic trees were constructed with bootstrap confidence values based on 1000 replicates. GenBank accession numbers for amino acid sequence comparisons are: AAQ65244 [zebrafish PEPT1 (Verri et al., 2003)], AAA17721 [rabbit PEPT1 (Fei et al., 1994)], NP\_001003036 (dog PEPT1), AAO43094 [pig PEPT1 (Klang et al., 2005)], XP\_599441 (bovine PEPT1), AAB61693 [human PEPT1 (Liang et al., 1995)], NP\_001028071 [macaque PEPT1 (Zhang et al., 2004a)], BAA09318 [rat PEPT1 (Miyamoto et al., 1996)], NP\_444309 [mouse PEPT1 (Fei et al., 2000)], AAK14788 [sheep PEPT1 (Pan et al., 2001)], AAK39954 [chicken PEPT1 (Chen et al., 2002)], AAO16604 (turkey PEPT1).

### *Reverse transcriptase-polymerase chain reaction (RT-PCR) expression analysis*

Total RNA was purified from heart, spleen, gill, eye, intestine, ovary, kidney and liver using the acid guanidinium thiocyanate-phenol-chloroform method (Chomczynski and Sacchi, 1987), and subjected to DNase treatment (Turbo DNase, Ambion). For regional analysis of the intestinal tract, total RNA was extracted from various gut segments, as depicted in Fig. 5 (see also *Animals and tissue sampling*). cDNA was synthesized starting from 1.5 µg total RNA, using SuperScript III (Invitrogen) and following the manufacturer's recommendations. The following Atlantic cod specific primers were designed on the basis of the nucleotide sequence GenBank accession no. CO541820 for *Gadus morhua* elongation factor 1α (EF1α) mRNA: forward primer CodEF1AF (5'-CCCCTCCAGGACGTCTACAAG-3') and reverse primer CodEF1AR (5'-GGCAGAGCCACCGATCTTC-3'), while the forward primer CodPepT1F (5'-CCGCTTCAGGAACCGT-

|                                                            |      |                                     |     |
|------------------------------------------------------------|------|-------------------------------------|-----|
| attgtctgtctcttccacctgaggactgtgttcaacaggtgactcccaca         | 51   |                                     |     |
|                                                            |      | <b>M E D R E N G K K</b>            | 9   |
| gccccactgcagcc                                             | 92   | ATG GAA GAC AGA GAG AAT GGG AAG AAG |     |
|                                                            |      | <b>P K K S V T V C G Y P L S</b>    | 22  |
| CCC AAG AAG TCG GTG ACT GTG TGT GGA TAC CCG CTG AGT        | 131  |                                     |     |
|                                                            |      | <b>I F F I V V D E F C E R F</b>    | 35  |
| ATC TTC TTC ATC GTG GTC GAC GAG TTC TCG GAG CGC TTC        | 170  |                                     |     |
| <u>S Y Y G M K A V L V L Y F</u>                           | 48   |                                     |     |
| TCC TAC TAT GGC ATG AAA GCG GTG CTG GTG CTG TAC TTC        | 209  |                                     |     |
| <u>R Y F L R W D D D L A I T</u>                           | 61   |                                     |     |
| CGG TAC TTC CTC CGC TGG GAC GAT GAC CTG GCC ATC ACC        | 248  |                                     |     |
| <b>II</b>                                                  |      |                                     |     |
| <u>I Y H T F V A L C Y L T P</u>                           | 74   |                                     |     |
| ATC TAC CAC ACC TTC GTG GCC CTC TGC TAC CTC ACG CCC        | 287  |                                     |     |
| <u>I L G A I V A D S W L G K</u>                           | 87   |                                     |     |
| ATC CTG GGG GCC ATC GTG GCC GAC TCC TGG CTC GGA AAG        | 326  |                                     |     |
| <b>III</b>                                                 |      |                                     |     |
| <u>F K T I V Y L S I V Y T L</u>                           | 100  |                                     |     |
| TTC AAG ACC ATC GTC TAC CTG TCC ATC GTT TAC ACT CTT        | 365  |                                     |     |
| <u>G O V V M A I S A I H D I</u>                           | 113  |                                     |     |
| GGC CAG GTC GTC ATG GCA ATC AGC GCC CAT GAC ATC            | 404  |                                     |     |
| <u>T D A N K D G T P D</u>                                 | 126  |                                     |     |
| ACA GAT GCT AAC AAA GAC GGG ACC CCC GAC AAC ATG ACG        | 443  |                                     |     |
| <b>IV</b>                                                  |      |                                     |     |
| <u>M H V A L S M V G L I L I</u>                           | 139  |                                     |     |
| TTC CAC GTG GCT CTG TCC ATG GTG GGT CTC ATC CTG ATC        | 482  |                                     |     |
| <u>A L G T G G G I K P C V A A</u>                         | 152  |                                     |     |
| GCC CTG GGC ACC GGC GGC ATC AAA CCC TGC CTC <u>GCC_GCC</u> | 521  |                                     |     |
| <u>F G G D Q F N E H Q E K Q</u>                           | 165  |                                     |     |
| TTC GGT GGA GAC CAG TTC AAT GAG CAC CAG GAG AAA CAG        | 560  |                                     |     |
| <b>V</b>                                                   |      |                                     |     |
| <u>R S T F F S I F Y L S I N</u>                           | 178  |                                     |     |
| AGG AGC ACC TTC TCC ATC TTC TAC TCC TCC ATC AAC            | 599  |                                     |     |
| <u>A G S L L S T I I T P I L</u>                           | 191  |                                     |     |
| GCA GGC AGC CTG CTG TCC ACC ATC ATC ACT CCC ATC CTC        | 638  |                                     |     |
| <u>R A Q E C G I Y S Q Q K C</u>                           | 204  |                                     |     |
| CGA GCC CAG GAG TGT GGC ATC TAC TCC CAG CAG AAG TGT        | 677  |                                     |     |
| <b>VI</b>                                                  |      |                                     |     |
| <u>Y P L A F G V P A A L M V</u>                           | 217  |                                     |     |
| TAC CCC CTG GCC TTC GGT GTG CCC GCT GCT CTC ATG GTG        | 716  |                                     |     |
| <u>V A L I V F I V G S R M Y</u>                           | 230  |                                     |     |
| GTG GCC CTA ATT GTG TTC ATT GTG GGC AGC AGA ATG TAC        | 755  |                                     |     |
| <u>T K V A P K G N I M L E V</u>                           | 243  |                                     |     |
| ACC AAG GTC GCC CCG AAG GGA AAC ATC ATG CTC GAG GTC        | 794  |                                     |     |
| <u>C K C I W Y A V K N R F R</u>                           | 256  |                                     |     |
| TGC AAG TGT ATC TGG TAT <u>GCA GTC AAA AAG CGC TTC AGG</u> | 833  |                                     |     |
| <u>N R S S S I P K R E H W M</u>                           | 269  |                                     |     |
| AAC CGT AGC TCG TCC ATC <u>CCC AAG CGA GAG CAC TGG ATG</u> | 872  |                                     |     |
| <b>VII</b>                                                 |      |                                     |     |
| <u>D W A D E K Y E K L L I A</u>                           | 282  |                                     |     |
| GAC TGG GCC GAT GAG AAG TAT GAG AAA CTC CTG ATC GCC        | 911  |                                     |     |
| <u>Q I K M V L K V L F L Y I</u>                           | 295  |                                     |     |
| CAG ATA AAG ATG GTG CTG AAA GTT CTG TTC CTC TAC ATC        | 950  |                                     |     |
| <u>P L P M F W T L F D Q Q S</u>                           | 308  |                                     |     |
| CCT CTT CCC ATG TTC TGG ACT CTC TTC GAC CAG CAG AGC        | 989  |                                     |     |
| <u>S R W T L Q A T T M D G D</u>                           | 321  |                                     |     |
| TCC AGA TGG ACA CTG CAG GCC ACC ACC ATG GAC GGA GAC        | 1028 |                                     |     |
| <b>VIII</b>                                                |      |                                     |     |
| <u>F G L L V I Q P D Q M Q T</u>                           | 334  |                                     |     |
| TTT GGT CTT TTG GTC ATT CAG CCC GAC CAG ATG CAG ACG        | 1067 |                                     |     |
| <u>V N P I L I L G F V P I V</u>                           | 347  |                                     |     |
| GTC AAC CCC ATC CTG ATT CTC GGC TTT GTT CCC ATC GTG        | 1106 |                                     |     |
| <u>D S V I Y P L I A K C G L</u>                           | 360  |                                     |     |
| GAC AGT GTG ATC TAT CCG CTG ATA GCC AAG TGC GGC CTC        | 1145 |                                     |     |
| <b>IX</b>                                                  |      |                                     |     |
| <u>N F T P L K R M T V G M F</u>                           | 373  |                                     |     |
| AAC TTC ACT CCA TTG AAG AGG ATG ACA GTG GGA ATG TTC        | 1184 |                                     |     |
| <u>M A A L A F I A A A L V Q</u>                           | 386  |                                     |     |
| ATG GCT GCC CTG GCT TTT ATT GCT GCT GCT CTC GTC CAG        | 1223 |                                     |     |
| <u>L Q I D E T L P V F P A S</u>                           | 399  |                                     |     |
| CTT CAG ATT GAT GAA ACA CTT CCT GTA TTC CCT GCT AGC        | 1262 |                                     |     |
| <u>N G G Q I K V F N L A G A</u>                           | 412  |                                     |     |
| AAT GGC GGC CAA ATC AAG GTC TTT AAC TTG GCC GGT GCG        | 1301 |                                     |     |
|                                                            |      | <b>T V D V S V G G Q N F T I</b>    | 425 |
| ACG GTG GAC GTC AGC GTA GGG GGC CAG AAC TTC ACG TTG        | 1340 |                                     |     |
|                                                            |      | <b>D P F M S N S K Y L S F E</b>    | 438 |
| GAC CCC TTC ATG TCC AAC AGT AAG TAC CTG TCG TTT GAG        | 1379 |                                     |     |
|                                                            |      | <b>G K I N I D I N K T S M P</b>    | 451 |
| GGC AAG ATC AAC ATT GAT ATA AAC AAG ACG AGC ATG CCT        | 1418 |                                     |     |
|                                                            |      | <b>L V L T N G T R R S V V I</b>    | 464 |
| TTA GTC CTG ACG AAT GGA ACC CGC AGG AGC GTC GTC ATC        | 1457 |                                     |     |
|                                                            |      | <b>D Q T F P N S I S Y E D M</b>    | 477 |
| GAC CAG ACG TTC CCG AAC AGT ATA <u>TCG TAC GAA GAT ATG</u> | 1496 |                                     |     |
|                                                            |      | <b>T A K P E Q G E N A I R F</b>    | 490 |
| <u>ACA CGG AAG</u> CCA GAA CAG GGA GAA AAC GCT ATC ACG TTC | 1535 |                                     |     |
|                                                            |      | <b>L N G L G E N V N V T S L</b>    | 503 |
| CTC AAC GGT TTG GGA GAA AAT GTG AAC GTG ACG TCG CTG        | 1574 |                                     |     |
|                                                            |      | <b>G N I P S M K M S K Y A L</b>    | 516 |
| GGG AAC ATC CCC TCC ATG AAG ATG TCA AAG TAT GCT CTT        | 1613 |                                     |     |
|                                                            |      | <b>V Q Q G S A Q F D I Q T V</b>    | 529 |
| GTA CAA CAG GGA AGT GCT CAG TTT GAT ATC CAA ACC GTG        | 1652 |                                     |     |
|                                                            |      | <b>N G K C T Y S I A V G F G</b>    | 542 |
| AAT GGC AAG TGT ACA TAT TCT ATA GCC GTG GGC TTT GGT        | 1691 |                                     |     |
|                                                            |      | <b>S A Y T V I I P D T F T I</b>    | 555 |
| AGC GCT TAC ACC GTC ATC ATC CCC GAC ACG TTC ACC ATC        | 1730 |                                     |     |
|                                                            |      | <b>A D C G G L R P E E D I G</b>    | 568 |
| GCT GAC TGT GGA GGC CTG CGT CCG GAG GAG GAC ATC GGC        | 1769 |                                     |     |
| <b>X</b>                                                   |      |                                     |     |
| <u>P N V V H M A W O I P O Y</u>                           | 581  |                                     |     |
| CCC AAC GTG GTG CAC ATG GCC TGG CAG ATC CCG GAG TAC        | 1808 |                                     |     |
| <u>F L M T M G E V V F S V T</u>                           | 594  |                                     |     |
| TTC CTG ATG ACC ATG GGC GAG GTG GTG TTC TCC GTC ACC        | 1847 |                                     |     |
| <u>G L E F S Y S Q A P S N M</u>                           | 607  |                                     |     |
| GGC CTG GAG TTC TCC TAC TCA CAG GCC CTT AGC AAC ATG        | 1886 |                                     |     |
| <b>XI</b>                                                  |      |                                     |     |
| <u>K S V L O A G W L F T V A</u>                           | 620  |                                     |     |
| AAG TCT GTG CTG CAA GCC GGT TGG CTG TTC ACG GTT GCC        | 1925 |                                     |     |
| <u>V G N I I V L I V A E V A</u>                           | 633  |                                     |     |
| GTG GGG AAC ATC ATC GTG CTC ATC GTG GCT GAA GTA GCT        | 1964 |                                     |     |
| <b>XII</b>                                                 |      |                                     |     |
| <u>Q L P D Q W A E Y V L F A</u>                           | 646  |                                     |     |
| CAG CTC CCA GAT CAG TGG GCC GAG TAC GTC CTG TTC GCC        | 2003 |                                     |     |
| <u>A L L I F V C V V F S I M</u>                           | 659  |                                     |     |
| GCG CTG CTG ATC TTC GTG TGT GTG GTG TTT TCC ATC ATG        | 2042 |                                     |     |
| <u>A Y F Y T Y T D P A E V E</u>                           | 672  |                                     |     |
| GCC TAC TTC TAC ACC TAC ACG GAC CCC GCC GAG GTC GAG        | 2081 |                                     |     |
| <u>A R F A E L E P E G K D N</u>                           | 685  |                                     |     |
| GCA CGC TTC GCC GAG CTG GAG CCC GAG GGC AAG GAC AAC        | 2120 |                                     |     |
| <u>D R K R R S L E L H D R K</u>                           | 698  |                                     |     |
| GAC AGG AAA AGG CGG AGC CTG GAG CTG CAC GAG AAG AAC        | 2159 |                                     |     |
| <u>E S L E E E N Q R K S R S</u>                           | 711  |                                     |     |
| GAG TCC CTG GAG GAA GAA AAC CAG AGG AAG AGC AGA AGC        | 2198 |                                     |     |
| <u>S S E A S S H H E A P A D</u>                           | 724  |                                     |     |
| AGC TCC GAG GCC AGC TCC CAC CAC GAG GCC CCC GCC GAC        | 2237 |                                     |     |
| <u>K A T N M ***</u>                                       | 729  |                                     |     |
| AAG GCC ACC AAC ATG TAG agacatgtctctctctatgatcgttc         | 2282 |                                     |     |
| tgtgtttttcttctgttttcttctgttttggctcatgcttctcagttctcgggga    | 2334 |                                     |     |
| tcaggcagtcggtgtgaagatcaagaggatggtcttccagtggtgttgatt        | 2386 |                                     |     |
| tggcggtttaacagttgaggaatggatgctgttgattgtaaggtacatggat       | 2438 |                                     |     |
| atggaggagggtctgtctgttctcttgagaatatattgtcgaaattgaa          | 2490 |                                     |     |
| tgcttaataatttgaatcccgtcttctgtcttaagaatgtaattctactg         | 2542 |                                     |     |
| aaaatattgtacatgtgtaattatttttttacaatggcatattttgac           | 2594 |                                     |     |
| tgtgtagcaaaagcaagattatgggtggctacattaaaagaccattaacc         | 2646 |                                     |     |
| attcgatttagtatttattgcccagcctgattttattgtaacatagattctt       | 2698 |                                     |     |
| taatgtaattgatgtaaggtgaagtaaatctcacccaatcaaggaggaaac        | 2750 |                                     |     |
| ttaaaagaccgccgatcaatttccctcaataaaaactttgtttggaaaa          | 2802 |                                     |     |
| aaaaaaaaaaaaaaaaaaaaaaaaaaaaaaaaaaaaaaaa                   | 2838 |                                     |     |

Fig. 1. Nucleotide and predicted amino acid sequence of Atlantic cod PepT1 (codPepT1). The numbers on the right refer to positions of the nucleotides (lower row) and amino acids (upper row). The stop codon is indicated by \*\*\*. A polyadenylation signal is underlined. Positions for degenerated (broken underline) and species specific (solid underline and double underline) primers are indicated in the nucleotide sequence. In the amino acid sequence, putative transmembrane domains are underlined in red and named I to XII. Potential extracellular N-glycosylation sites (dark green boxed areas) and potential cAMP/cGMP-dependent protein kinase phosphorylation sites at the cytoplasmic surface (light grey boxed areas) are indicated.

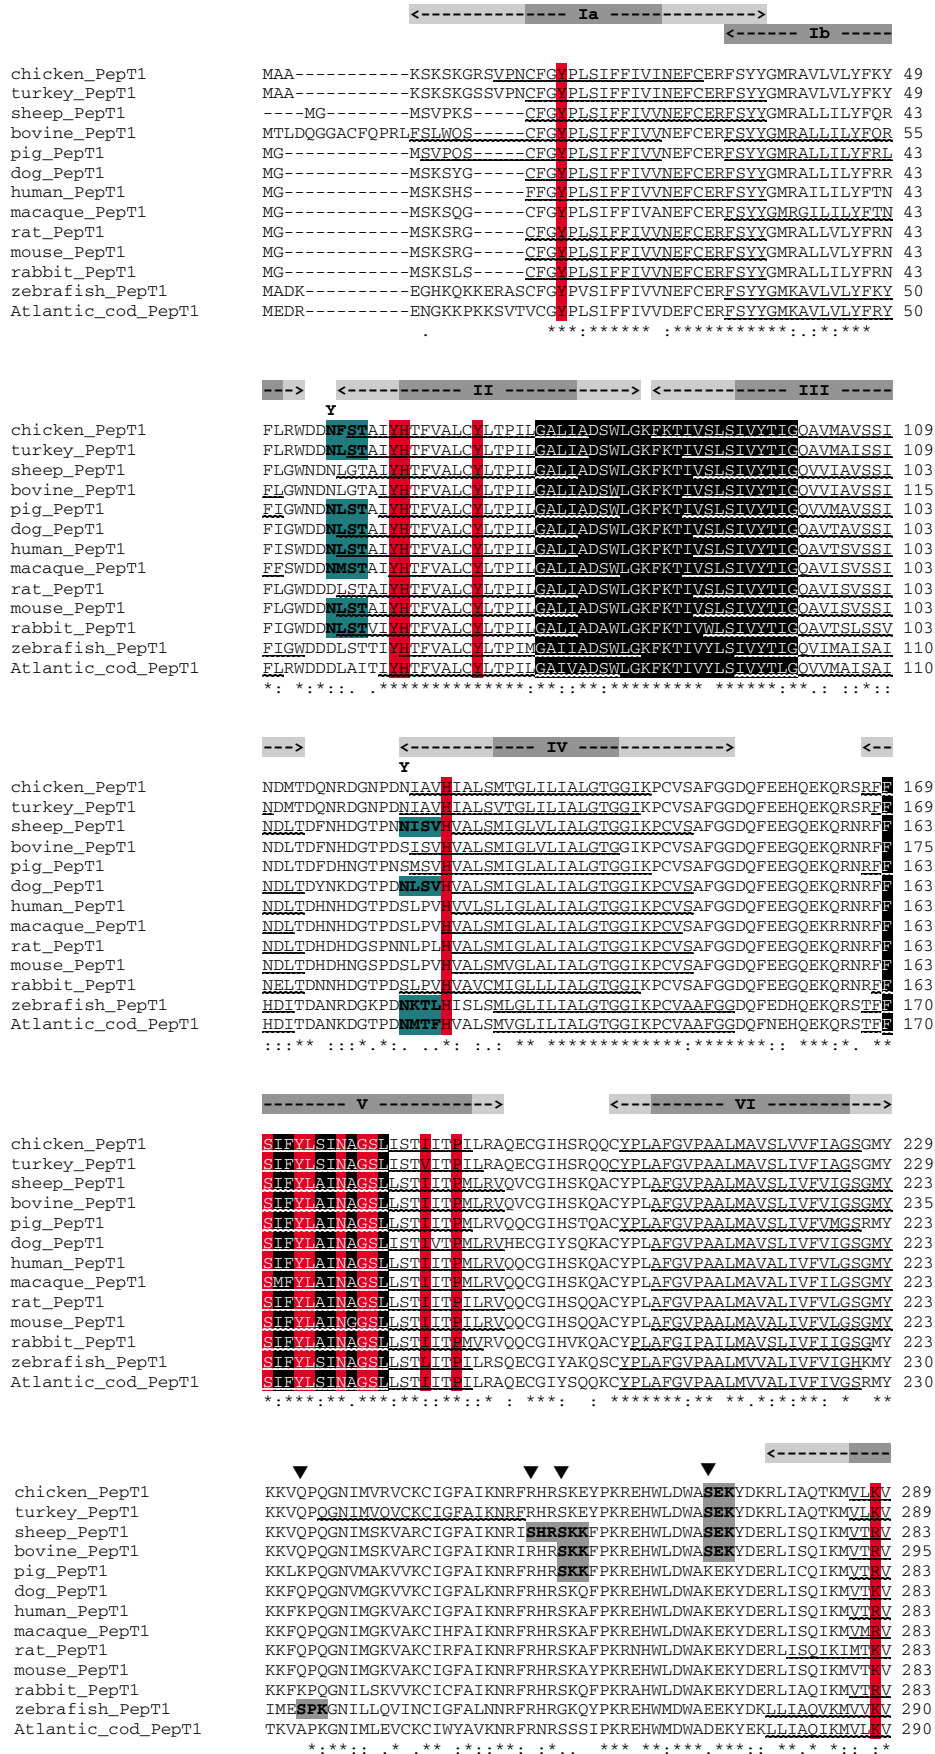

Fig. 2 continued on next page.





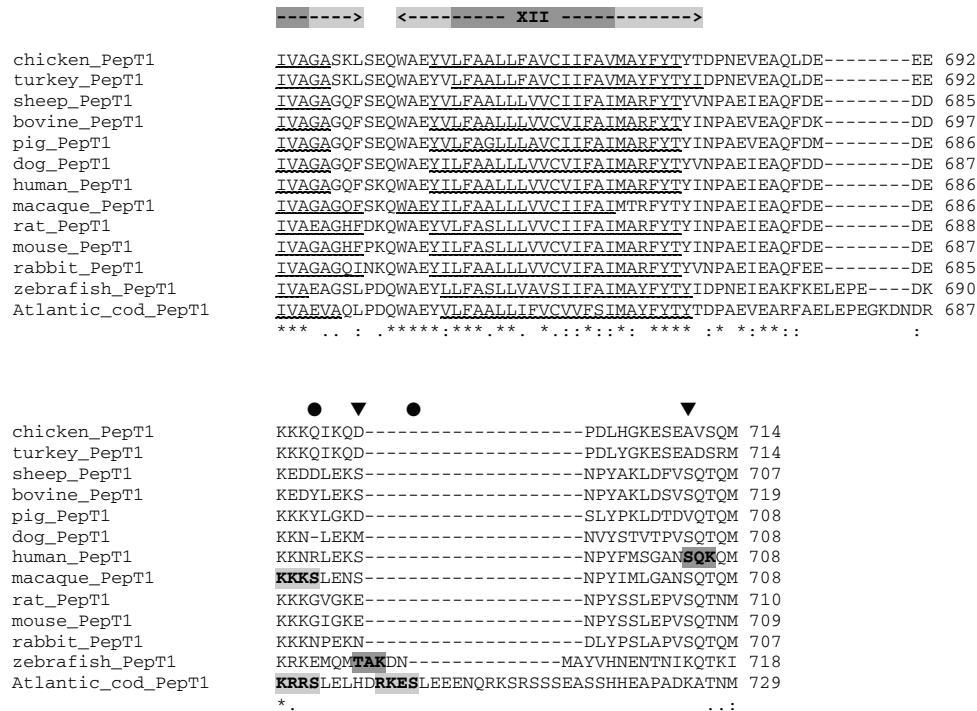

Fig. 2. Amino acid alignment of human, macaque, rat, mouse, dog, rabbit, sheep, cow, pig, chicken, turkey, zebrafish and Atlantic cod PepT1. Multiple sequence alignment was generated using Clustal W 1.82 using the tool at the [www.ebi.ac.uk/clustalw](http://www.ebi.ac.uk/clustalw) web site with the following (default) parameters: Matrix=Gonnet 250, Gap Open=10, End Gaps=-1, Gap Extension=0.2, Gap Distances=4. Putative transmembrane segments (Ia to XII) were predicted using the TMHMM 2.0 program (TMHMM Server v. 2.0 at <http://www.cbs.dtu.dk/services/TMHMM-2.0/>), which is part of the Simple Modular Architecture Research Tool (SMART; at <http://www.expasy.org/prosite/>), and are indicated by grey-boxed double-headed broken arrows (with darker grey designating the core stretch of amino acids within each putative TMHMM-predicted transmembrane segment that is shared by at least two of the aligned sequences). Within each sequence, the topological location of each TMHMM2-predicted transmembrane helix is specifically underlined. Potential phosphorylation (solid triangle, protein kinase C; solid circle, protein kinase A) and N-glycosylation (Y) sites are indicated and correspondently highlighted in dark grey, light grey and dark green, respectively, along the sequences where found. The proposed 'PTR2 family proton/oligopeptide symporters signature 1' motif (PROSITE pattern: PS01022; amino acid residues 77–101 in Atlantic cod PepT1) and 'PTR2 family proton/oligopeptide symporters signature 2' motif (PROSITE pattern: PS01023; amino acid residues 170–182 in Atlantic cod PepT1) are highlighted in black. Individual amino acid residues identified by site-directed mutagenesis in PepT1 proteins from various mammalian species and found to be either involved in transport activity or responsible for incorrect synthesis and/or transport of the protein to the plasma membrane are indicated in red (for details, see Table 1).

AGC-3') and the reverse primer CodPepT1R (5'-TTCGC-TGTCATATCTTCGTACGA-3') were used for amplification of Atlantic cod PepT1. The PCR reactions were conducted for 35 cycles (1 cycle: 45 s at 95°C, 30 s at 60°C and 50 s at 72°C), followed by a 10 min final extension at 72°C, with *Taq* DNA polymerase. The PCR products were size-fractionated by agarose gel electrophoresis.

#### *In situ hybridization*

Tracts of cod intestine were dissected out, cut into smaller pieces, and fixed in 4% paraformaldehyde in 0.1 mol l<sup>-1</sup> phosphate buffer (PB: 0.028 mol l<sup>-1</sup> NaH<sub>2</sub>PO<sub>4</sub>, 0.071 mol l<sup>-1</sup> Na<sub>2</sub>HPO<sub>4</sub>, pH 7.2) for 16 h at 4°C. Buffer was changed twice to 25% sucrose in PB for 30 min and 15 min, and samples were kept in 25% sucrose in PB with 10% Tissue Tek (Miles Inc., Elkhart, IN, USA) overnight at 4°C. The tissues were embedded in Tissue Tek and stored at -80°C. Cryostat sections (10 μm thick) were collected on frozen Superfrost Plus glass slides (Merck, Darmstadt, Germany), air-dried and stored at -20°C until use.

The nucleotide fragment covering amino acids 254–480 of Atlantic cod PepT1 sequence was amplified by PCR using the forward primer CodPepT1F (starting at nucleotide 824) and the reverse primer CodPepT1R (starting at nucleotide 1504; see Fig. 1). The amplification product was subcloned into the pCR4-TOPO vector (Invitrogen) and the recombinant clone sequenced to confirm the identity of the insert. *In situ* analysis was performed with digoxigenin (DIG)-labeled cRNA probes (sense and antisense), using a DIG RNA labeling Kit (Roche, Mannheim, Germany). The DIG-labelled antisense riboprobe was synthesized *in vitro* with T7 RNA polymerase using the *Spe*I-cleaved recombinant pCR4-TOPO clone. The corresponding sense riboprobe was synthesized with T3 RNA polymerase using the *Not*I-cleaved recombinant pCR4-TOPO clone. DIG incorporation and the concentration of the probes were analyzed by spot tests (Roche).

*In situ* hybridization procedures on tissue sections were carried out according to published methods (Ebbesson et al., 2005).





Table 1. Effect of single amino acid substitutions (as obtained by site-directed mutagenesis) on the function of mammalian (human, rabbit and rat) PepT1 transport proteins

| Amino acid         | Mutation                                  | Effect of mutation                                                                                                                                                                                    | Proposed function of the residue                                                                                                     | Experimental system                                                                                                                                                                | Reference                                                         |
|--------------------|-------------------------------------------|-------------------------------------------------------------------------------------------------------------------------------------------------------------------------------------------------------|--------------------------------------------------------------------------------------------------------------------------------------|------------------------------------------------------------------------------------------------------------------------------------------------------------------------------------|-------------------------------------------------------------------|
| <b>Human PepT1</b> |                                           |                                                                                                                                                                                                       |                                                                                                                                      |                                                                                                                                                                                    |                                                                   |
| Y12                | Y12A                                      | Mutation has a modest effect on Gly-Sar uptake and primarily affects the $V_{\max}$ value of the translocation process                                                                                |                                                                                                                                      | Transfection of HEK293 cells and radioactive peptide uptake                                                                                                                        | (Bolger et al., 1998)                                             |
| H57                | H57Q<br>H57N                              | Mutants have no detectable peptide transport activity                                                                                                                                                 | H57 is involved in binding and translocation of H <sup>+</sup> cotransported with the peptide and is a principal proton-binding site | Expression in <i>Xenopus</i> oocytes and electrophysiology; transfection of HeLa cells and radioactive peptide uptake; transfection of HEK293 cells and radioactive peptide uptake | (Fei et al., 1997; Uchiyama et al., 2003)                         |
|                    | H57A<br>H57R<br>H57K                      | Mutants have no detectable peptide transport activity; moreover, mutant H57R evokes increasing steady-state currents with gradual increase of the pH (5.0–8.5)                                        |                                                                                                                                      |                                                                                                                                                                                    |                                                                   |
| H121               | H121A<br>H121R<br>H121K                   | Mutants show reduced uptake of Gly-Sar by 43% (H121A), 45% (H121R), 75% (H121K); moreover, mutants H121R and H121K show a significant decrease of Gly-Sar uptake at pH 7.4 and 8.5 compared to pH 6.0 | H121 is probably involved in substrate recognition and is not involved in H <sup>+</sup> binding                                     | Expression in <i>Xenopus</i> oocytes and electrophysiology; transfection of HEK293 cells and radioactive peptide uptake                                                            | (Uchiyama et al., 2003)                                           |
| S164               | S164C                                     | Mutant is not expressed on the plasma membrane                                                                                                                                                        | This amino acid position is responsible for incorrect packaging and/or transport of the protein to the plasma membrane               | Transfection of HEK293 cells and immunofluorescence experiments                                                                                                                    | (Kulkarni et al., 2003a)                                          |
| Y167               | Y167A<br>Y167F<br>Y167H<br>Y167S<br>Y167C | Uptake of Gly-Sar is abolished                                                                                                                                                                        | This residue has an essential role in dipeptide uptake (due to the unique chemistry of its phenolic side chain)                      | Transfection of HEK293 cells and radioactive peptide uptake                                                                                                                        | (Bolger et al., 1998; Kulkarni et al., 2003a; Yeung et al., 1998) |
| L168               | L168C                                     | Mutant is not expressed on the plasma membrane                                                                                                                                                        | This amino acid position is responsible for incorrect packaging and/or transport of the protein to the plasma membrane               | Transfection of HEK293 cells and immunofluorescence experiments                                                                                                                    | (Kulkarni et al., 2003a)                                          |
| N171               | N171C                                     | Uptake of Gly-Sar is abolished                                                                                                                                                                        | This amino acid plays a critical role in substrate binding                                                                           | Transfection of HEK293 cells and radioactive peptide uptake                                                                                                                        | (Kulkarni et al., 2003a)                                          |
| G173               | G173C                                     | Mutant is not expressed on the plasma membrane                                                                                                                                                        | This amino acid position is responsible for incorrect packaging and/or transport of the protein to the plasma membrane               | Transfection of HEK293 cells and immunofluorescence experiments                                                                                                                    | (Kulkarni et al., 2003a)                                          |

Table continued on next page

Table 1. *Continued*

| Amino acid         | Mutation                | Effect of mutation                                                                                                                 | Proposed function of the residue                                                                                                                                                                                                                                                 | Experimental system                                             | Reference                                                            |
|--------------------|-------------------------|------------------------------------------------------------------------------------------------------------------------------------|----------------------------------------------------------------------------------------------------------------------------------------------------------------------------------------------------------------------------------------------------------------------------------|-----------------------------------------------------------------|----------------------------------------------------------------------|
| <b>Human PepT1</b> |                         |                                                                                                                                    |                                                                                                                                                                                                                                                                                  |                                                                 |                                                                      |
| S174               | S174C                   | Uptake of Gly-Sar is abolished                                                                                                     | This amino acid plays a critical role in substrate binding                                                                                                                                                                                                                       | Transfection of HEK293 cells and radioactive peptide uptake     | (Kulkarni et al., 2003a)                                             |
| I179               | I179C                   | Mutant is not expressed on the plasma membrane                                                                                     | This amino acid position is responsible for incorrect packaging and/or transport of the protein to the plasma membrane                                                                                                                                                           | Transfection of HEK293 cells and immunofluorescence experiments | (Kulkarni et al., 2003a)                                             |
| P182               | P182C                   | Mutant shows ~40% of Gly-Sar uptake                                                                                                |                                                                                                                                                                                                                                                                                  | Transfection of HEK293 cells and radioactive peptide uptake     | (Kulkarni et al., 2003a)                                             |
| R282               | R282A<br>R282C<br>R282K | Mutations have a modest effect on Gly-Sar uptake                                                                                   | The positive charge is important at amino acid position 282. A salt-bridge between R282-D341 may play a role in maximizing the efficiency of substrate translocation.                                                                                                            | Transfection of HEK293 cells and radioactive peptide uptake     | (Bolger et al., 1998; Kulkarni et al., 2007; Kulkarni et al., 2003b) |
|                    | R282E<br>R282D          | Mutants show significantly reduced uptake of Gly-Sar                                                                               |                                                                                                                                                                                                                                                                                  |                                                                 |                                                                      |
| Y287               | Y287C                   | Mutant is not expressed on the plasma membrane                                                                                     | Single cysteine mutation at this position is responsible for incorrect synthesis and/or misfolding of the mutated protein                                                                                                                                                        | Transfection of HEK293 cells and immunofluorescence experiments | (Kulkarni et al., 2003b)                                             |
| M292               | M292C                   | Mutant is not expressed on the plasma membrane                                                                                     | Single cysteine mutation at this position is responsible for incorrect synthesis and/or misfolding of the mutated protein                                                                                                                                                        | Transfection of HEK293 cells and immunofluorescence experiments | (Kulkarni et al., 2003b)                                             |
| F293               | F293C                   | Mutant displays negligible uptake of Gly-Sar                                                                                       | This residue probably plays a structural role in the transporter function                                                                                                                                                                                                        | Transfection of HEK293 cells and radioactive peptide uptake     | (Kulkarni et al., 2003b)                                             |
| W294               | W294A                   | Mutant shows reduced uptake of Gly-Sar (~8%); in particular, mutation has a significant effect on the Michaelis-Menten $K_m$ value | This residue plays a role in maintaining the structural integrity of the protein. The larger size of the cysteine side chain, compared with that of alanine, sufficiently reflects the steric bulk of the tryptophan side chain and better maintains the correct helical packing | Transfection of HEK293 cells and radioactive peptide uptake     | (Bolger et al., 1998; Kulkarni et al., 2003b)                        |
|                    | W294C                   | Mutant does not show reduced uptake of Gly-Sar                                                                                     |                                                                                                                                                                                                                                                                                  |                                                                 |                                                                      |
| L296               | L296C                   | Mutant displays negligible uptake of Gly-Sar                                                                                       | This residue probably plays a structural role in the transporter function                                                                                                                                                                                                        | Transfection of HEK293 cells and radioactive peptide uptake     | (Kulkarni et al., 2003b)                                             |
| F297               | F297C                   | Mutant displays negligible uptake of Gly-Sar                                                                                       | This residue probably plays a structural role in the transporter function                                                                                                                                                                                                        | Transfection of HEK293 cells and radioactive peptide uptake     | (Kulkarni et al., 2003b)                                             |
| D341               | D341A<br>D341E          | Mutations do not show significantly reduced uptake of Gly-Sar                                                                      | The negative charge is important at amino acid position 341. A salt-bridge between R282-D341 may play a role in maximizing the efficiency of substrate translocation                                                                                                             | Transfection of HEK293 cells and radioactive peptide uptake     | (Kulkarni et al., 2007)                                              |
|                    | D341K<br>D341R          | Mutants show significantly reduced uptake of Gly-Sar                                                                               |                                                                                                                                                                                                                                                                                  |                                                                 |                                                                      |

Table continued on next page

Table 1. Continued

| Amino acid          | Mutation       | Effect of mutation                                                                                                   | Proposed function of the residue                                                                      | Experimental system                                                                                     | Reference               |
|---------------------|----------------|----------------------------------------------------------------------------------------------------------------------|-------------------------------------------------------------------------------------------------------|---------------------------------------------------------------------------------------------------------|-------------------------|
| <b>Human PepT1</b>  |                |                                                                                                                      |                                                                                                       |                                                                                                         |                         |
| P586                | P586L          | Mutant shows reduced transport capacity, lower protein level and lower plasma membrane expression                    | P586 may have profound effects on translation, degradation, and/or membrane insertion                 | Transfection of HeLa cells, radioactive peptide uptake and immunocytochemical and Western blot analyses | (Zhang et al., 2004b)   |
| E595                | E595A          | Mutant shows reduced uptake of Gly-Sar (~95%)                                                                        |                                                                                                       | Transfection of HEK293 cells and radioactive peptide uptake                                             | (Bolger et al., 1998)   |
| <b>Rabbit PepT1</b> |                |                                                                                                                      |                                                                                                       |                                                                                                         |                         |
| Y56                 | Y56A<br>Y56F   | Mutant Y56F exhibits slightly decreased functional activities, while Y56A exhibits no significant activities         | This aromatic residue stabilizes the charge on H <sup>+</sup> when interacting with H57               | Expression in <i>Xenopus</i> oocytes and radioactive peptide uptake or electrophysiology                | (Chen et al., 2000)     |
| H57                 | H57R           | Mutant has no detectable peptide transport activity                                                                  | H57 residue is involved in the binding of H <sup>+</sup> to the transporter                           | Expression in <i>Xenopus</i> oocytes and radioactive peptide uptake or electrophysiology                | (Chen et al., 2000)     |
| Y64                 | Y64A<br>Y64F   | Mutant Y64F exhibits slightly decreased functional activities, while Y64A exhibits no significant activities         | This aromatic residue stabilizes the charge on H <sup>+</sup> when interacting with H57               | Expression in <i>Xenopus</i> oocytes and radioactive peptide uptake or electrophysiology                | (Chen et al., 2000)     |
| H121                | H121R<br>H121C | Affinity of H121 mutants for peptide substrates decreases depending on the charge of the substrate                   | H121 is involved in substrate recognition                                                             | Expression in <i>Xenopus</i> oocytes and radioactive peptide uptake or electrophysiology                | (Chen et al., 2000)     |
| R282                | R282E          | Mutation uncouples the H <sup>+</sup> -peptide cotransport and creates a peptide-gated cation channel in the protein |                                                                                                       | Expression in <i>Xenopus</i> oocytes and radioactive peptide uptake or electrophysiology                | (Meredith, 2004)        |
| W294                | W294F          | Mutant does not show any peptide uptake and does not produce any depolarization of membrane potential                |                                                                                                       | Expression in <i>Xenopus</i> oocytes and radioactive peptide uptake or electrophysiology                | (Panitsas et al., 2006) |
| <b>Rat PepT1</b>    |                |                                                                                                                      |                                                                                                       |                                                                                                         |                         |
| H57                 | H57Q           | Uptake of Gly-Sar is abolished                                                                                       | H57 is involved in substrate binding and/or is responsible for intrinsic activity of the transporter  | Expression in <i>Xenopus</i> oocytes and radioactive peptide uptake                                     | (Terada et al., 1996)   |
| H121                | H121Q          | Uptake of Gly-Sar is abolished                                                                                       | H121 is involved in substrate binding and/or is responsible for intrinsic activity of the transporter | Expression in <i>Xenopus</i> oocytes and radioactive peptide uptake                                     | (Terada et al., 1996)   |

Amino acid notation follows the single letter code.

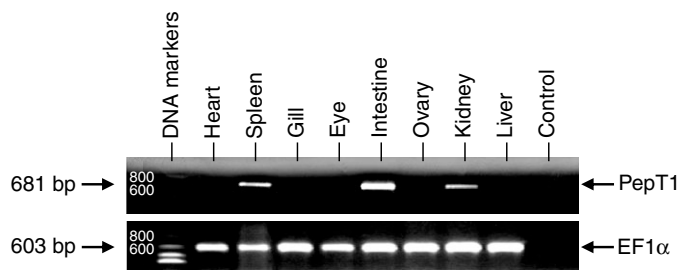

Fig. 4. Tissue distribution of Atlantic cod PepT1 mRNA in adult fish. RT-PCR performed on equal amounts of total RNA (1.5 µg) isolated from adult fish tissues using Atlantic cod PepT1- (top row) and EF1 $\alpha$ -specific (bottom row) primers. Control, no RNA (H<sub>2</sub>O instead) in RT (negative control). DNA markers indicate 10 kb SmartLadder (Eurogentec, Seraing, Belgium).

important within the mammalian PepT1 primary structure (for example, see Daniel, 2004) were invariably conserved in Atlantic cod PepT1, as well as the PepT1 sequence of the zebrafish. These include the 'PTR2 family proton/oligopeptide symporters signature 1' motif (PROSITE pattern: PS01022; amino acid residues 77–101 in Atlantic cod PepT1) and 'PTR2 family proton/oligopeptide symporters signature 2' motif (PROSITE pattern: PS01023; amino acid residues 170–182 in Atlantic cod PepT1).

The next examination involved comparative analysis to confirm identity along the vertebrate series of those amino acids for which mutational studies in mammalian systems had previously assessed a significant effect on function. Amino acids along the sequences for which mutational analysis was performed are highlighted in Fig. 2. All of them fall within putative membrane-spanning domains (namely membrane-spanning domains I, II, IV, V, VII, VIII and X) and are invariably conserved (identities or conservative substitutions) among the species. A list of the effects of a single amino acid substitution, as obtained by site-directed mutagenesis, on the function of human, rabbit and rat PepT1 transporters, is reported in Table 1.

#### Expression of Atlantic cod PepT1 in tissues

Expression of Atlantic cod PepT1 was analysed in various tissues/organs of adult fish. Using Atlantic cod PepT1-specific primers, a 681 bp RT-PCR product was amplified from total RNA isolated from intestine, kidney and spleen. No signal was obtained from samples of heart, gill, eye or liver, while a slight signal was obtained from ovary. As a control to assess RNA quality, EF1 $\alpha$  RNA amplification was performed using Atlantic cod EF1 $\alpha$ -specific primers, which invariably gave comparable 603 bp amplification products for all tissues tested (Fig. 4).

Spatial distribution of Atlantic cod PepT1 expression in the digestive tract was studied in detail (Fig. 5). A 681 bp RT-PCR product was amplified from total RNA isolated from a total of ten segments (see Fig. 5A) along the intestine of adult fish. No signal was obtained from the stomach (segment 1; see Fig. 5B), while strong signals were obtained in the following segments. There appeared to be a weakening in the signal from segment 9 (the last 1/5 of the intestine), but in the last segment, which included the hindgut, the expression was very low (see Fig. 5B).

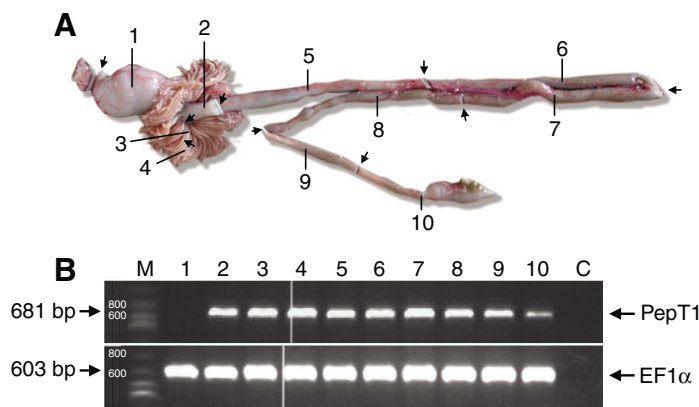

Fig. 5. Spatial distribution of Atlantic cod PepT1 mRNA in the digestive tract of adult fish. (A) A representative picture of Atlantic cod digestive tract. 1, stomach; 2, pyloric area; 3, pyloric caeca (inner segments); 4, pyloric caeca (outer segments); 5–10, six adjacent intestinal segments in the remainder of the digestive tract, starting after the pyloric area (segment 5) and ending with the anus (segment 10), and based on divisions of the three loops present in the dissected gut. The last segment (e.g. segment 10) also comprises the hindgut. Arrows indicate the incisions between the segments. (B) RT-PCR performed on equal amounts of total RNA (1.5 µg) isolated from the different segments of the digestive tract of Atlantic cod using PepT1- (top row) and EF1 $\alpha$ -specific (bottom row) primers. Progressive numbers (1 to 10) indicate the segments of the digestive tract indicated in A. Control (C), no RNA (H<sub>2</sub>O instead) in RT (negative control); M, DNA markers (10 kb SmartLadder; Eurogentec).

The control for RNA quality (EF1 $\alpha$  RNA amplification) invariably gave comparable 603 bp amplification products for all tested segments.

Expression of PepT1 mRNA at the intestinal level was further analyzed by *in situ* hybridization (Fig. 6). Using the DIG-labeled antisense probe, expression of the PepT1 mRNA was detected only in the epithelial layer of the intestine of Atlantic cod (see Fig. 6B), while the sense probe revealed no staining (see Fig. 6A).

#### Discussion

We have identified a full-length cDNA from Atlantic cod that encodes for a novel PepT1-type peptide transporter (Fig. 1). The predicted protein, designated as codPepT1, shares a high overall identity with PepT1-type transporters (58–63%) when compared to other known PepT1 proteins in vertebrates (Fig. 2), and clusters to the 'fish' branch of the reconstructed phylogenetic tree, together with zebrafish PepT1 (Fig. 3). To date, codPepT1 represents the second PepT1-type peptide transporter recognized from a teleost fish [after zebrafish PepT1 (Verri et al., 2003)], thus representing an additional molecular tool for the understanding of evolutionary and functional relationships among vertebrate peptide transporters.

In this paper, the comparative analysis of two fish (Atlantic cod and zebrafish) amino acid sequences *vs* a collection of sequences from various tetrapod (two avian and nine mammalian) species has allowed the recognition of a number of highly conserved motifs, regions and protein domains (and the exclusion of others) simply on the basis of the overall

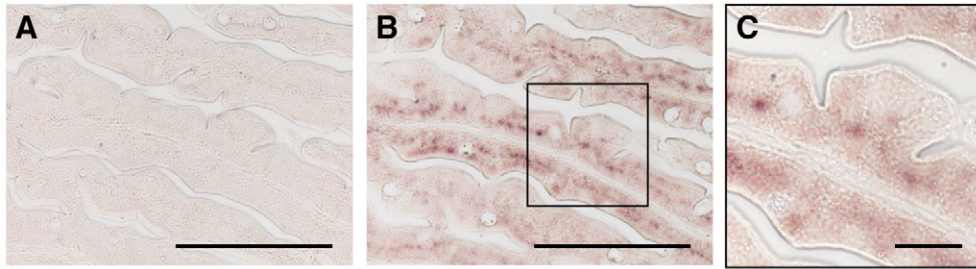

Fig. 6. PepT1 gene expression on neighbor sections of Atlantic cod intestine by *in situ* hybridization. (A) The sense probe showed no staining (negative control). (B) The antisense probe revealed mRNA expression in the epithelial layer of the intestine. (C) Epithelium from boxed area in B enlarged. Scale bars, 100  $\mu\text{m}$  (A,B), 20  $\mu\text{m}$  (C).

sequence alignment (see Fig. 2), as well as a better representation of some still unresolved areas of the protein. It is noteworthy that the individuation of two adjacent sub-regions of hydrophobic amino acids instead of one single membrane-spanning domain I is suggestive of the existence of a very large hydrophobic area close to the N terminus of the PepT1 proteins. Moreover, the occurrence, beside the large N-glycosylation-rich region, of short, well-conserved stretches of amino acids within the big extracellular loop is novel structural evidence that deserves further study. The only highly conserved cAMP/cGMP-dependent protein kinase phosphorylation motif close to membrane-spanning domain IX (found in all vertebrate sequences with the exception of the human) and the adjacent protein kinase C phosphorylation motif (found in mammalian sequences only) would also merit further analysis, mostly in the light of the well-documented regulation of PepT1 protein activity in Caco-2 cells, mammalian models and human intestine, *via* agonists or antagonists of protein kinase A and C and hormones/extracellular signals (for a review, see Daniel, 2004). It is also noteworthy that none of the PepT1 protein kinase phosphorylation motifs have been analyzed so far with respect to their ability to functionally transmit the observed effects of second messengers at the protein level.

Functional analysis of mammalian PepT1 transporters has led to a general scheme of peptide transport and to the concept that such transport occurs in virtually all vertebrates according to the basic design (in terms of mode of transport, kinetics, proton- and membrane potential-dependence, pH dependence, electrogenicity, substrate specificity, protein sorting to the membrane, etc.) defined in the mammalian systems (for reviews, see Brandsch et al., 2004; Daniel, 2004; Daniel and Kottra, 2004; Daniel et al., 2006; Terada and Inui, 2004). Interestingly, the structural/functional characterization of zebrafish PepT1 partly contradicted this assumption, revealing that this transporter closely resembles mammalian systems in terms of low-affinity/high-capacity properties of the transport, but also exhibits some peculiarities, such as a unique pH dependence (Verri et al., 2003). It also suggested that fish PepT1 proteins might have allowed a useful comparative approach to focus on amino acid residues, motifs, conserved regions and protein domains that are relevant to the general function of the transporter or, conversely, to the determination of a species-specific phenotype. Since 1997, the function of mammalian PepT1 proteins has been progressively

investigated with the support of single amino acid mutational analysis to define relevant structural/functional motifs or domains involved in the manifestation of the phenotype (see Table 1 and references therein). Such investigation allowed the identification of many amino acids that play a crucial role in the function of the transporter, although it was performed on an almost random basis and focused primarily on the functional role of selected transmembrane domains. In this respect, using our comparative analysis, we confirmed identity or conservative substitution along the vertebrate series of all those amino acids (23 amino acid residues distributed in membrane-spanning domains I, II, IV, V, VII, VIII and X; see Fig. 2) for which functional mutational analysis had established a significant effect on function. In perspective, such a comparative approach might help to rationalize the selection of the most suitable amino acid residues to target in site-directed mutagenesis experiments.

Atlantic cod PepT1 is highly expressed in the intestine, and a significant RT-PCR signal was also found in both kidney and spleen tissue (Fig. 4). Interestingly, this is the same pattern of expression as is found in zebrafish for PepT1 (Verri et al., 2003), which confirms a common theme among fish. A more detailed analysis of the regional distribution along the intestinal tract of cod, as performed herein for the first time in an adult fish to our knowledge, revealed that PepT1 is ubiquitously expressed in all segments after the stomach, including the pyloric caeca (Figs 5 and 6). This suggests that Atlantic cod may have a very high capacity to absorb small peptides from dietary protein digestion, with absorption occurring in most parts of the intestine. The low expression in the last segment that included the hindgut indicates that this segment is not, or only slightly, involved in peptide absorption. However, it may be involved in final adjustments of ion and water composition (for a review, see Marshall and Grosell, 2005).

In conclusion, the Atlantic cod intestinal PepT1-type oligopeptide transporter has been identified and characterized with respect to its expression in tissues. On the basis of the overall amino acid sequence alignment, conserved amino acids and novel motifs, regions and protein domains have been recognized in all vertebrates. In a perspective, Atlantic cod PepT1 can represent a useful tool for the study of gut regionalization, as well as a marker for the functional analysis of temporal and spatial expression during ontogeny, under the effects of various dietary sources, and in pathological states.

Supported by a study leave grant from the University of Bergen to I.R. and Research Council of Norway grants 165203/S40, 174229/S15 and 175021. A.R. and T.V. acknowledge support from grants from the University of Salento (Fondi ex-60%, 2006) and from the Apulian Region (Progetto Strategico, cod. Cip PS\_070, and Progetto Esplorativo, cod. Cip PE\_062). Thanks to Dr V. Laize (UALG-CCMAR), V. Tronci and Dr C. Jolly (UoB) for additional technical assistance. I.R. thanks M. Leonor Cancela and her group for creating excellent working conditions during his sabbatical stay at CCMAR.

### References

- Altschul, S. F., Madden, T. L., Schaffer, A. A., Zhang, J. H., Zhang, Z., Miller, W. and Lipman, D. J. (1997). Gapped BLAST and PSI-BLAST: a new generation of protein database search programs. *Nucleic Acids Res.* **25**, 3389-3402.
- Bolger, M. B., Haworth, I. S., Yeung, A. K., Ann, D., von Grafenstein, H., Hamm-Alvarez, S., Okamoto, C. T., Kim, K. J., Basu, S. K., Wu, S. et al. (1998). Structure, function, and molecular modeling approaches to the study of the intestinal dipeptide transporter PepT1. *J. Pharm. Sci.* **87**, 1286-1291.
- Brander, K. M. (2007). The role of growth changes in the decline and recovery of North Atlantic cod stocks since 1970. *ICES J. Mar. Sci.* **64**, 211-217.
- Brandsch, M., Knutter, I. and Leibach, F. H. (2004). The intestinal H<sup>+</sup>/peptide symporter PEPT1: structure-affinity relationships. *Eur. J. Pharm. Sci.* **21**, 53-60.
- Chen, H., Pan, Y. X., Wong, E. A., Bloomquist, J. R. and Webb, K. E. (2002). Molecular cloning and functional expression of a chicken intestinal peptide transporter (cPepT1) in *Xenopus* oocytes and Chinese hamster ovary cells. *J. Nutr.* **132**, 387-393.
- Chen, X. Z., Steel, A. and Hediger, M. A. (2000). Functional roles of histidine and tyrosine residues in the H<sup>+</sup>-peptide transporter PepT1. *Biochem. Biophys. Res. Commun.* **272**, 726-730.
- Chomczynski, P. and Sacchi, N. (1987). Single-step method of RNA isolation by acid guanidinium thiocyanate-phenol-chloroform extraction. *Anal. Biochem.* **162**, 156-159.
- Daniel, H. (2004). Molecular and integrative physiology of intestinal peptide transport. *Annu. Rev. Physiol.* **66**, 361-384.
- Daniel, H. and Kottra, G. (2004). The proton oligopeptide cotransporter family SLC15 in physiology and pharmacology. *Pflugers Arch.* **447**, 610-618.
- Daniel, H., Spanier, B., Kottra, G. and Weitz, D. (2006). From bacteria to man: archaic proton-dependent peptide transporters at work. *Physiology* **21**, 93-102.
- Ebbesson, L. E., Tipsmark, C. K., Holmqvist, B., Nilsen, T., Andersson, E., Stefansson, S. O. and Madsen, S. S. (2005). Nitric oxide synthase in the gill of Atlantic salmon: colocalization with and inhibition of Na<sup>+</sup>,K<sup>+</sup>-ATPase. *J. Exp. Biol.* **208**, 1011-1017.
- Fei, Y. J., Kanai, Y., Nussberger, S., Ganapathy, V., Leibach, F. H., Romero, M. F., Singh, S. K., Boron, W. F. and Hediger, M. A. (1994). Expression cloning of a mammalian proton-coupled oligopeptide transporter. *Nature* **368**, 563-566.
- Fei, Y. J., Liu, W., Prasad, P. D., Kekuda, R., Oblak, T. G., Ganapathy, V. and Leibach, F. H. (1997). Identification of the histidyl residue obligatory for the catalytic activity of the human H<sup>+</sup>/peptide cotransporters PEPT1 and PEPT2. *Biochemistry* **36**, 452-460.
- Fei, Y. J., Sugawara, M., Liu, J. C., Li, H. W., Ganapathy, V., Ganapathy, M. E. and Leibach, F. H. (2000). cDNA structure, genomic organization, and promoter analysis of the mouse intestinal peptide transporter PEPT1. *Biochim. Biophys. Acta* **1492**, 145-154.
- Klang, J. E., Burnworth, L. A., Pan, Y. X., Webb, K. E. and Wong, E. A. (2005). Functional characterization of a cloned pig intestinal peptide transporter (pPepT1). *J. Anim. Sci.* **83**, 172-181.
- Kulkarni, A. A., Haworth, I. S. and Lee, V. H. L. (2003a). Transmembrane segment 5 of the dipeptide transporter hPepT1 forms a part of the substrate translocation pathway. *Biochem. Biophys. Res. Commun.* **306**, 177-185.
- Kulkarni, A. A., Haworth, I. S., Uchiyama, T. and Lee, V. H. L. (2003b). Analysis of transmembrane segment 7 of the dipeptide transporter hPepT1 by cysteine-scanning mutagenesis. *J. Biol. Chem.* **278**, 51833-51840.
- Kulkarni, A. A., Davies, D. L., Links, J. S., Patel, L. N., Lee, V. H. L. and Haworth, I. S. (2007). A charge pair interaction between Arg282 in transmembrane segment 7 and Asp341 in transmembrane segment 8 of hPepT1. *Pharm. Res.* **24**, 66-72.
- Kumar, S., Tamura, K. and Nei, M. (2004). MEGA3: Integrated software for molecular evolutionary genetics analysis and sequence alignment. *Brief. Bioinformatics* **5**, 150-163.
- Liang, R., Fei, Y. J., Prasad, P. D., Ramamoorthy, S., Han, H., Yang-Feng, T. L., Hediger, M. A., Ganapathy, V. and Leibach, F. H. (1995). Human intestinal H<sup>+</sup>/peptide cotransporter. Cloning, functional expression, and chromosomal localization. *J. Biol. Chem.* **270**, 6456-6463.
- Marshall, W. S. and Grosell, M. (2005). Ion transport, osmoregulation and acid-base balance. In *Physiology of Fishes*. Vol. 3 (ed. D. Evans and J. B. Claiborne), pp. 177-230. Boca Raton: CRC Press.
- Meredith, D. (2004). Site-directed mutation of arginine 282 to glutamate uncouples the movement of peptides and protons by the rabbit proton-peptide cotransporter PepT1. *J. Biol. Chem.* **279**, 15795-15798.
- Miyamoto, K., Shiraga, T., Morita, K., Yamamoto, H., Haga, H., Taketani, Y., Tamai, I., Sai, Y., Tsuji, A. and Takeda, E. (1996). Sequence, tissue distribution and developmental changes in rat intestinal oligopeptide transporter. *Biochim. Biophys. Acta* **1305**, 34-38.
- Pan, Y. X., Wong, E. A., Bloomquist, J. R. and Webb, K. E. (2001). Expression of a cloned ovine gastrointestinal peptide transporter (oPepT1) in *Xenopus* oocytes induces uptake of oligopeptides in vitro. *J. Nutr.* **131**, 1264-1270.
- Panitsas, K. E., Boyd, C. A. R. and Meredith, D. (2006). Evidence that the rabbit proton-peptide co-transporter PepT1 is a multimer when expressed in *Xenopus laevis* oocytes. *Pflugers Arch.* **452**, 53-63.
- Rubio-Aliaga, I. and Daniel, H. (2002). Mammalian peptide transporters as targets for drug delivery. *Trends Pharmacol. Sci.* **23**, 434-440.
- Saitou, N. and Nei, M. (1987). The neighbor-joining method – a new method for reconstructing phylogenetic trees. *Mol. Biol. Evol.* **4**, 406-425.
- Terada, T. and Inui, K. (2004). Peptide transporters: structure, function, regulation and application for drug delivery. *Curr. Drug Metab.* **5**, 85-94.
- Terada, T., Saito, H., Mukai, M. and Inui, K. (1996). Identification of the histidine residues involved in substrate recognition by a rat H<sup>+</sup>/peptide cotransporter, PEPT1. *FEBS Lett.* **394**, 196-200.
- Uchiyama, T., Kulkarni, A. A., Davies, D. L. and Lee, V. H. L. (2003). Biophysical evidence for His57 as a proton-binding site in the mammalian intestinal transporter hPepT1. *Pharm. Res.* **20**, 1911-1916.
- Verri, T., Kottra, G., Romano, A., Tiso, N., Peric, M., Maffia, M., Boll, M., Argenton, F., Daniel, H. and Storelli, C. (2003). Molecular and functional characterisation of the zebrafish (*Danio rerio*) PEPT1-type peptide transporter. *FEBS Lett.* **549**, 115-122.
- Yeung, A. K., Basu, S. K., Wu, S. K., Chu, C., Okamoto, C. T., Hamm-Alvarez, S. F., von Grafenstein, H., Shen, W. C., Kim, K. J., Bolger, M. B. et al. (1998). Molecular identification of a role for tyrosine 167 in the function of the human intestinal proton-coupled dipeptide transporter (hPepT1). *Biochem. Biophys. Res. Commun.* **250**, 103-107.
- Zhang, E. Y., Emerick, R. M., Pak, Y. A., Wrighton, S. A. and Hillgren, K. M. (2004a). Comparison of human and monkey peptide transporters: PEPT1 and PEPT2. *Mol. Pharmacol.* **1**, 201-210.
- Zhang, E. Y., Fu, D. J., Pak, Y. A., Stewart, T., Mukhopadhyay, N., Wrighton, S. A. and Hillgren, K. M. (2004b). Genetic Polymorphisms in human proton-dependent dipeptide transporter PEPT1: implications for the functional role of Pro(586). *J. Pharmacol. Exp. Ther.* **310**, 437-445.
